# Supplementary material for: Multi-layer coupling between SURFEX-TEB-V9.0 andMeso-NH-v5.3 for modelling the urban climate of high-rise cities
Source: Copernicus journal article supplement (doi:10.5194/gmd-2020-190), 2020-07-07
Supplement: Supplementary file 1 [file Supplement.pdf › Supplement.pdf]

# **Overview of the source code modifications, numerical simulations, and postprocessing scripts described in the research article "Multi-layer coupling between SURFEX-TEB-V9.0 and Meso-NH-v5.3 for modelling the urban climate of high-rise cities", Geoscientific Model Development Discussions**

## **Modified source code**

We attach an archive (MODIFIED\_Schoetter\_etal\_GMDD\_Multilayer.tar.gz) containing the routines of SURFEX and Meso-NH including the model developments discussed in the research article “Multi-layer coupling between SURFEX-TEB-V9.0 and Meso-NH-v5.3.1 for modelling the urban climate of high-rise cities”. The master version of Meso-NH-v5.3.1 containing also SURFEX can be downloaded via <http://mesonh.aero.obs-mip.fr/mesonh53/>.

The main scientific modifications of the SURFEX-TEB and the Meso-NH-v5.3.1 equations described in the present article are the following:

- The drag force the buildings exert of the horizontal wind components, the production of turbulent kinetic energy by the wind shear close to the buildings, and the tendencies of potential temperature and water vapour mixing ratio due to the heat and moisture fluxes from the building walls and roof (Equations 1-4 and Equations 7-9) are considered in the routine MNH/drag\_bld.f90.
- The extraction of the Meso-NH variables for the forcing of SURFEX-TEB with several atmospheric model levels (Equations 10-16) is made in MNH/ground\_paramn.f90. The Meso-NH routine ground\_paramn.f90 calls the SURFEX routine SURFEX/coupling\_surf\_atmn.F90, which is technically modified to accept 2D forcing fields instead of 1D forcing fields. These 2D forcing fields are further passed to SURFEX/coupling\_townn.F90, SURFEX/coupling\_teb\_orographyn.F90, and SURFEX/coupling\_tebn.F90.
- In SURFEX/coupling\_tebn.F90, the logical switch LATM\_CANOPY read from the SURFEX namelist “NAM\_PREP\_TEB” controls whether the 1D column model described by Hamdi and Masson (2008) is used for the calculation of a vertical profile of the meteorological variables in the urban canopy layer, using the first atmospheric layer as upper boundary condition (LATM\_CANOPY=F) or whether the meteorological forcing from multiple Meso-NH levels is directly used as meteorological forcing for the ground surfaces, building walls, and roofs (LATM\_CANOPY=T) (Equations 17 to 23).
- The value of the drag due to the roofs (Equations 5-6) is calculated in SURFEX/coupling\_tebn.F90.

## **Numerical simulations**

The simulation directories for the numerical simulations conducted to test the different coupling approaches for the heat waves in 2009 and 2018 are provided in the following directories, whose names correspond to those used in the manuscript.

- HK\_HWMay2018\_CLASSICAL.tar.gz
- HK\_HWMay2018\_NEW.tar.gz
- HK\_HWMay2018\_SURFFLUX.tar.gz
- HK\_HWSep2009\_CLASSICAL.tar.gz
- HK\_HWSep2009\_NEW.tar.gz
- HK\_HWSep2009\_SURFFLUX.tar.gz

Urban morphology data are given in SURF\_FILES.tar.gz, the Sea Surface Temperature forcing data in SST\_FILES.tar.gz. The European Centre for Medium-Range Weather Forecasts (ECMWF) Integrated Forecasting System high-resolution operational forecast analyses preprocessed by the PREP\_REAL\_CASE program (in the 002\_COUPLING folder) used for the lateral forcing of the coarsest resolution model domain are not included since the data volume is too large. They are available on request.

The multi-layer coupling is activated in the Meso-NH namelists (EXSEGNN.nam with NN the domain number, located in the TEMPLATES folder) via the new namelist NAM\_COUPLING\_LEVELSn. In this namelist, NLEV\_COUPLE = NLEV indicates the number of Meso-NH levels to be coupled with SURFEX. In the SURFEX namelist NAM\_PREP\_TEB, LATM\_CANOPY=T needs to be specified to activate the multi-layer coupling. Incoherent specification of the Meso-NH and the SURFEX namelist will lead to a model abort. Building drag (LDRAGBLDG=T) and building heat and moisture fluxes at multiple atmospheric levels (LFLUXBLDG=T) can be activated via the new Meso-NH namelist NAM\_DRAGBLDGn.

### **Postprocessing scripts**

The scripts to postprocess the observations and model results in order to calculate the model evaluation measures or to create the figures are provided. These scripts are written in R and python.

General postprocessing of the different simulations including unit conversions, averaging over selected time periods, extraction of grid points nearest to the station location:

- ONLINE\_PLOT\_HongKong\_HW2009\_CLASSICAL.R
- ONLINE\_PLOT\_HongKong\_HW2009\_Final.R (for the NEW configuration)
- ONLINE\_PLOT\_HongKong\_HW2009\_SURFFLUX.R
- ONLINE\_PLOT\_HongKong\_HW2018\_CLASSICAL.R
- ONLINE\_PLOT\_HongKong\_HW2018\_Final.R (for the NEW configuration)
- ONLINE\_PLOT\_HongKong\_HW2018\_SURFFLUX.R
- ONLINE\_PLOT\_HongKong\_May2018.R (the simulation covering entire May 2018)

CALC\_EVALMEASURES\_HongKong.R: Calculation of the model evaluation measures for different coupling approaches.

PLOTEVALMEASURES\_HongKong\_scenarios.R: Creating the figures synthetising the evaluation measures for all stations and coupling approaches.

PLOT\_PROFILE.R: Plotting the vertical profiles to compare with radiosoundings.

BUDGETS.py: Postprocessing of the budgets calculated by Meso-NH.

Plot\_Budgets.R: Plot the results of the budgets.

subloadobs.R: Load the observation data.

subplot.R: Subroutines related to plotting.
